# Supplementary material for: Assessing the Development and Intensity of the Urban Heat Island through Weather Types in the Attica Region, Greece
Source: Preprints.org preprint supplement (doi:10.20944/preprints202305.1871.v1), 2023-05-26
Supplement: Supplementary file 3 [file supplementary]

**Supplementary information for:**

**Assessing the development and intensity of the urban heat island through local weather types in the Attica region, Greece**


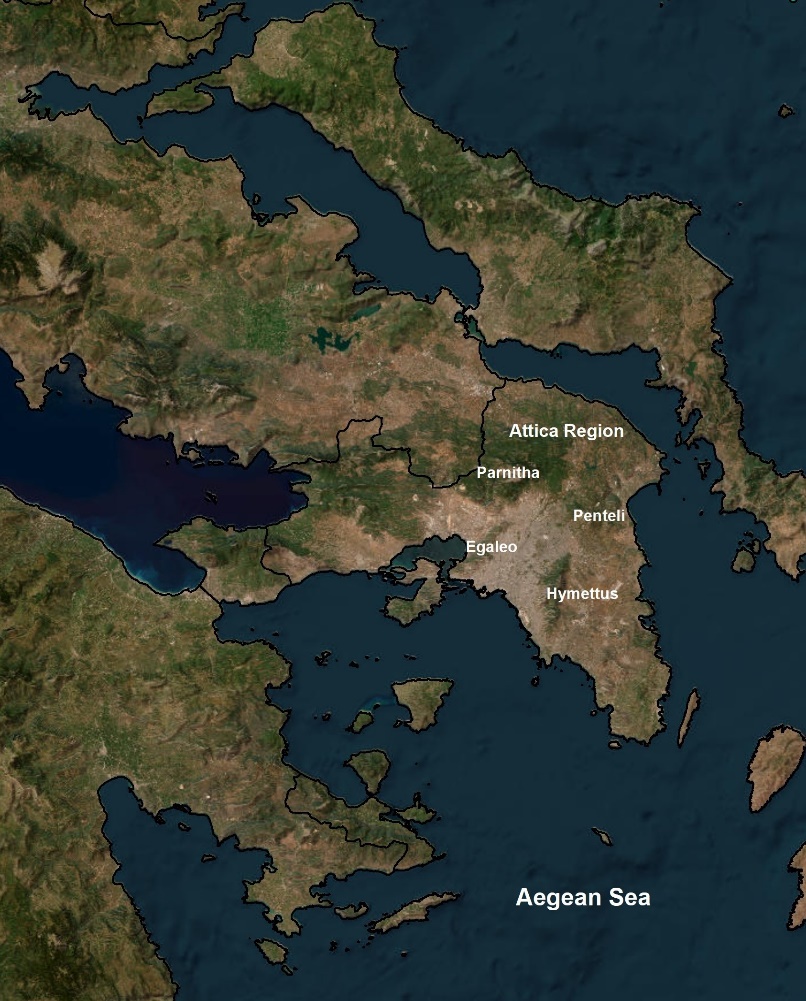


**Figure S1.** Geographical position and topographic context of Attica region

**Figure S2**. The Scree plots used for the selection of the number of PCs in wider domain (a) and sub-domain (b).


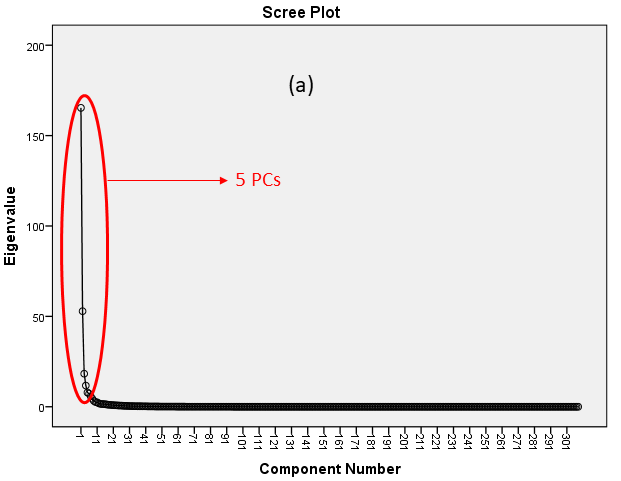

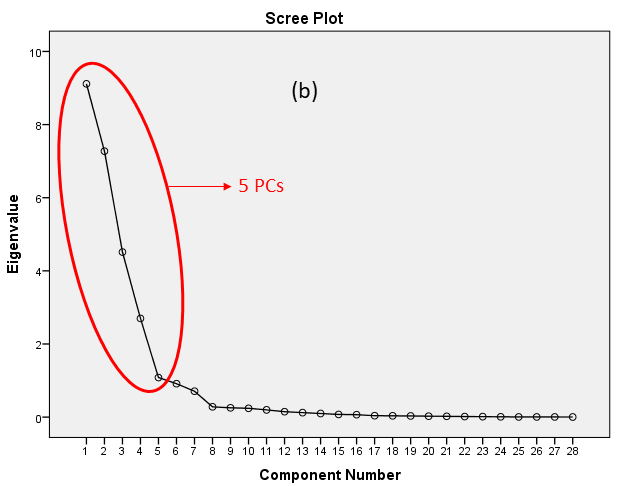


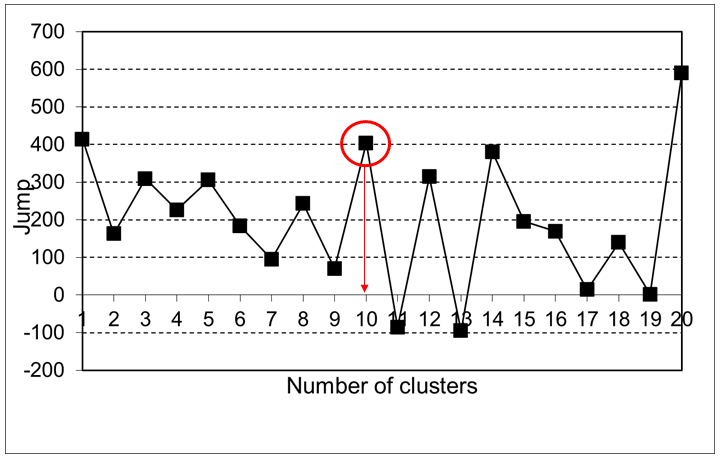


**Figure S3**. Τhe ‘jump’ plot based on the distortion test used for the selection of the number of clusters. Red marking the selected numbers.
